# Supplementary material
Source: PubMed Central journal article supplement (PMC4429908)
Supplement: NIHMS679111-supplement-Permission_--_Fig_1_and_7A__7B.pdf [file NIHMS679111-supplement-Permission_--_Fig_1_and_7A__7B.pdf]

## SPRINGER LICENSE TERMS AND CONDITIONS

Sep 06, 2014

---



---

This is a License Agreement between John J Ryan ("You") and Springer ("Springer") provided by Copyright Clearance Center ("CCC"). The license consists of your order details, the terms and conditions provided by Springer, and the payment terms and conditions.

**All payments must be made in full to CCC. For payment instructions, please see information listed at the bottom of this form.**

|                                          |                                                                                                                                                                                                            |
|------------------------------------------|------------------------------------------------------------------------------------------------------------------------------------------------------------------------------------------------------------|
| License Number                           | 3462851156655                                                                                                                                                                                              |
| License date                             | Sep 06, 2014                                                                                                                                                                                               |
| Licensed content publisher               | Springer                                                                                                                                                                                                   |
| Licensed content publication             | Journal of Molecular Medicine                                                                                                                                                                              |
| Licensed content title                   | The inhibition of pyruvate dehydrogenase kinase improves impaired cardiac function and electrical remodeling in two models of right ventricular hypertrophy: resuscitating the hibernating right ventricle |
| Licensed content author                  | Lin Piao                                                                                                                                                                                                   |
| Licensed content date                    | Jan 1, 2009                                                                                                                                                                                                |
| Volume number                            | 88                                                                                                                                                                                                         |
| Issue number                             | 1                                                                                                                                                                                                          |
| Type of Use                              | Journal/Magazine                                                                                                                                                                                           |
| Requestor type                           | Publisher                                                                                                                                                                                                  |
| Publisher                                | Wolters Kluwer Health, LWW                                                                                                                                                                                 |
| Portion                                  | Figures                                                                                                                                                                                                    |
| Format                                   | Print                                                                                                                                                                                                      |
| Number of figures                        | 1                                                                                                                                                                                                          |
| Print run                                | 1                                                                                                                                                                                                          |
| Author of this Springer article          | Yes and you are a contributor of the new work                                                                                                                                                              |
| Order reference number                   | None                                                                                                                                                                                                       |
| Original figure numbers                  | Figure 3, Figure 8.                                                                                                                                                                                        |
| Title of new article                     | Emerging concepts in the molecular basis of pulmonary arterial hypertension (PAH): Part I: Metabolic plasticity and mitochondrial dynamics in the pulmonary circulation and right ventricle in PAH         |
| Publication the new article is in        | Circulation                                                                                                                                                                                                |
| Author of new article                    | John J Ryan and Stephen L. Archer                                                                                                                                                                          |
| Expected publication date of new article | Jan 2015                                                                                                                                                                                                   |

Estimated size of new article 7  
(pages)

Total 0.00 USD

[Terms and Conditions](#)

### Introduction

The publisher for this copyrighted material is Springer Science + Business Media. By clicking "accept" in connection with completing this licensing transaction, you agree that the following terms and conditions apply to this transaction (along with the Billing and Payment terms and conditions established by Copyright Clearance Center, Inc. ("CCC"), at the time that you opened your Rightslink account and that are available at any time at <http://myaccount.copyright.com>).

### Limited License

Springer Science + Business Media hereby grants to you a non-exclusive license to use this material, for the use as indicated in your inquiry. Licenses are for one-time use only with a maximum distribution equal to the number that you identified in the licensing process.

This License includes use in an electronic form, provided it's password protected, on intranet, or CD-Rom/E-book. For any other electronic use, please contact Springer at [permissions.dordrecht@springer.com](mailto:permissions.dordrecht@springer.com) or [permissions.heidelberg@springer.com](mailto:permissions.heidelberg@springer.com)

Although Springer holds copyright to the material and is entitled to negotiate on rights, this license is only valid, provided permission is also obtained from the author (address is given with the article/chapter) and provided it concerns original material which does not carry references to other sources (if material in question appears with credit to another source, authorization from that source is required as well).

### Geographic Rights: Scope

Licenses may be exercised anywhere in the world.

### Altering/Modifying Material: Not Permitted

However figures and illustrations may be altered minimally to serve your work. Any other abbreviations, additions, deletions and/or any other alterations shall be made only with prior written authorization of the author(s) and/or Springer Science + Business Media. (Please contact Springer at [permissions.dordrecht@springer.com](mailto:permissions.dordrecht@springer.com) or [permissions.heidelberg@springer.com](mailto:permissions.heidelberg@springer.com))

### Reservation of Rights

Springer Science + Business Media reserves all rights not specifically granted in the combination of (i) the license details provided by you and accepted in the course of this licensing transaction, (ii) these terms and conditions and (iii) CCC's Billing and Payment terms and conditions.

### License Contingent on Payment

While you may exercise the rights licensed immediately upon issuance of the license at the end of the licensing process for the transaction, provided that you have disclosed complete and accurate details of your proposed use, no license is finally effective unless and until full payment is received from you (either by Springer Science + Business Media or by CCC) as provided in CCC's Billing and Payment terms and conditions. If full payment is not received by Due Date, then any license preliminarily granted shall be deemed automatically revoked

and shall be void as if never granted. Further, in the event that you breach any of these terms and conditions or any of CCC's Billing and Payment terms and conditions, the license is automatically revoked and shall be void as if never granted. Use of materials as described in a revoked license, as well as any use of the materials beyond the scope of an unrevoked license, may constitute copyright infringement and Springer Science + Business Media reserves the right to take any and all action to protect its copyright in the materials.

#### Copyright Notice:

Please include the following copyright citation referencing the publication in which the material was originally published. Where wording is within brackets, please include verbatim.

"With kind permission from Springer Science+Business Media: <book/journal title, chapter/article title, volume, year of publication, page, name(s) of author(s), figure number(s), and any original (first) copyright notice displayed with material>."

#### Warranties

Springer Science + Business Media makes no representations or warranties with respect to the licensed material.

#### Indemnity

You hereby indemnify and agree to hold harmless Springer Science + Business Media and CCC, and their respective officers, directors, employees and agents, from and against any and all claims arising out of your use of the licensed material other than as specifically authorized pursuant to this license.

#### No Transfer of License

This license is personal to you and may not be sublicensed, assigned, or transferred by you to any other person without Springer Science + Business Media's written permission.

#### No Amendment Except in Writing

This license may not be amended except in a writing signed by both parties (or, in the case of Springer Science + Business Media, by CCC on Springer Science + Business Media's behalf).

#### Objection to Contrary Terms

Springer Science + Business Media hereby objects to any terms contained in any purchase order, acknowledgment, check endorsement or other writing prepared by you, which terms are inconsistent with these terms and conditions or CCC's Billing and Payment terms and conditions. These terms and conditions, together with CCC's Billing and Payment terms and conditions (which are incorporated herein), comprise the entire agreement between you and Springer Science + Business Media (and CCC) concerning this licensing transaction. In the event of any conflict between your obligations established by these terms and conditions and those established by CCC's Billing and Payment terms and conditions, these terms and conditions shall control.

#### Jurisdiction

All disputes that may arise in connection with this present License, or the breach thereof, shall be settled exclusively by the country's law in which the work was originally published.

Other terms and conditions:

v1.3

**You will be invoiced within 48 hours of this transaction date. You may pay your invoice by credit card upon receipt of the invoice for this transaction. Please follow instructions provided at that time.**

**To pay for this transaction now; please remit a copy of this document along with your payment. Payment should be in the form of a check or money order referencing your account number and this invoice number RLNK501396076.**

**Make payments to "COPYRIGHT CLEARANCE CENTER" and send to:**

**Copyright Clearance Center**

**Dept 001**

**P.O. Box 843006**

**Boston, MA 02284-3006**

**Please disregard electronic and mailed copies if you remit payment in advance.**

**Questions? [customercare@copyright.com](mailto:customercare@copyright.com) or +1-855-239-3415 (toll free in the US) or +1-978-646-2777.**

**Gratis licenses (referencing \$0 in the Total field) are free. Please retain this printable license for your reference. No payment is required.**

---

---
