# Supplementary material
Source: PubMed Central journal article supplement (PMC4429908)
Supplement: NIHMS679111-supplement-Permission_--_Fig_4.pdf [file NIHMS679111-supplement-Permission_--_Fig_4.pdf]

## WOLTERS KLUWER HEALTH LICENSE TERMS AND CONDITIONS

Sep 06, 2014

---

This is a License Agreement between John J Ryan ("You") and Wolters Kluwer Health ("Wolters Kluwer Health") provided by Copyright Clearance Center ("CCC"). The license consists of your order details, the terms and conditions provided by Wolters Kluwer Health, and the payment terms and conditions.

**All payments must be made in full to CCC. For payment instructions, please see information listed at the bottom of this form.**

|                                        |                                                                                                                                                                                                                                    |
|----------------------------------------|------------------------------------------------------------------------------------------------------------------------------------------------------------------------------------------------------------------------------------|
| License Number                         | 3462860370772                                                                                                                                                                                                                      |
| License date                           | Sep 06, 2014                                                                                                                                                                                                                       |
| Licensed content publisher             | Wolters Kluwer Health                                                                                                                                                                                                              |
| Licensed content publication           | Circulation Research                                                                                                                                                                                                               |
| Licensed content title                 | Dynamin-Related Protein 1-Mediated Mitochondrial Mitotic Fission Permits Hyperproliferation of Vascular Smooth Muscle Cells and Offers a Novel Therapeutic Target in Pulmonary Hypertension                                        |
| Licensed content author                | Glenn Marsboom, Peter T. Toth, John J. Ryan, Zhigang Hong, Xichen Wu, Yong-Hu Fang, Thenappan Thenappan, Lin Piao, Hannah J. Zhang, Jennifer Pogoriler, Yimei Chen, Erik Morrow, E. Kenneth Weir, Jalees Rehman, Stephen L. Archer |
| Licensed content date                  | May 25, 2012                                                                                                                                                                                                                       |
| Volume Number                          | 110                                                                                                                                                                                                                                |
| Issue Number                           | 11                                                                                                                                                                                                                                 |
| Type of Use                            | Journal/Magazine                                                                                                                                                                                                                   |
| Requestor type                         | Not-for-profit                                                                                                                                                                                                                     |
| Format                                 | Print                                                                                                                                                                                                                              |
| Portion                                | Figures/table/illustration                                                                                                                                                                                                         |
| Number of figures/tables/illustrations | 1                                                                                                                                                                                                                                  |
| Figures/tables/illustrations used      | Figure 1                                                                                                                                                                                                                           |
| Author of this Wolters Kluwer article  | Yes                                                                                                                                                                                                                                |
| Will you be translating?               | No                                                                                                                                                                                                                                 |
| Title of new article                   | Emerging concepts in the molecular basis of pulmonary arterial hypertension (PAH): Part I: Metabolic plasticity and mitochondrial dynamics in the pulmonary circulation and right ventricle in PAH                                 |
| Publication the new article is in      | Circulation                                                                                                                                                                                                                        |
| Publisher of new article               | Wolters Kluwer Health, LWW                                                                                                                                                                                                         |

Author of new article John J Ryan and Stephen L. Archer

Expected publication date of new article Jan 2015

Estimated size of new article 7 (pages)

Billing Type Invoice

Billing address 5296 S Hillsden Dr  
SALT LAKE CITY, UT 84117  
United States

Total 0.00 USD

Terms and Conditions

### Terms and Conditions

1. A credit line will be prominently placed and include the author(s), title of article, title of journal, volume number, issue number and inclusive pages.
2. The requestor warrants that the material shall not be used in any manner which may be considered derogatory to the title, content, or authors of the material, or to Wolters Kluwer.
3. Permission granted is non-exclusive, and is valid throughout the world in the English language and the languages specified in your original request.
4. Wolters Kluwer cannot supply the requestor with the original artwork or a "clean copy."
5. Permission is valid if the borrowed material is original to a Wolters Kluwer imprint (Lippincott-Raven Publishers, Williams & Wilkins, Lea & Febiger, Harwal, Rapid Science, Little Brown & Company, Harper & Row Medical, American Journal of Nursing Co, and Urban & Schwarzenberg - English Language).
6. If you opt not to use the material requested above, please notify RightsLink or Wolters Kluwer Health/Lippincott Williams & Wilkins within 90 days of the original invoice date.
7. This permission does not apply to images that are credited to publications other than Wolters Kluwer journals. For images credited to non-Wolters Kluwer journal publications, you will need to obtain permission from the journal referenced in the figure or table legend or credit line before making any use of the image(s) or table(s).
8. Adaptations are protected by copyright, so if you would like to reuse material that we have adapted from another source, you will need not only our permission, but the permission of the rights holder of the original material. Similarly, if you want to reuse an adaptation of original LWW content that appears in another publisher's work, you will need our permission and that of the next publisher. The adaptation should be credited as follows: Adapted with permission from Lippincott Williams and Wilkins/Wolters Kluwer Health: Book author, title, year of publication or Journal name, article author, title, reference citation, year of publication.
9. **Please note that modification of text within figures or full-text article is strictly forbidden.**
10. Please note that articles in the ahead-of-print stage of publication can be cited and the content may be re-used by including the date of access and the unique DOI number. Any final changes in manuscripts will be made at the time of print publication and will be reflected in the final electronic version of the issue. Disclaimer: Articles appearing in the Published Ahead-of-Print section have been peer-reviewed and accepted for publication in the relevant journal and posted online before print publication. Articles appearing as publish ahead-of-print may contain statements, opinions, and information that have errors in facts, figures, or interpretation. Accordingly, Lippincott Williams & Wilkins, the editors and authors and their respective employees are not responsible or liable for the use of any such inaccurate or misleading data, opinion or information contained in the articles in this section.
11. Permission is granted for a one time use only within 12 months from the date of this

invoice. Rights herein do not apply to future reproductions, editions, revisions, or other derivative works. Once the 12-month term has expired, permission to renew must be submitted in writing.

12. The following statement needs to be added when reprinting the material in Open Access journals only: 'promotional and commercial use of the material in print, digital or mobile device format is prohibited without the permission from the publisher Lippincott Williams & Wilkins. Please contact [journalpermissions@lww.com](mailto:journalpermissions@lww.com) for further information♦.
13. In case of ***Disease Colon Rectum, Plastic Reconstructive Surgery, The Green Journal, Critical Care Medicine, Pediatric Critical Care Medicine, the American Heart Publications, the American Academy of Neurology*** the following guideline applies: no drug brand/trade name or logo can be included in the same page as the material re-used
14. When requesting a permission to translate a full text article, Wolters Kluwer/Lippincott Williams & Wilkins requests to receive the pdf of the translated document
15. Other Terms and Conditions:

v1.9

**You will be invoiced within 48 hours of this transaction date. You may pay your invoice by credit card upon receipt of the invoice for this transaction. Please follow instructions provided at that time.**

**To pay for this transaction now; please remit a copy of this document along with your payment. Payment should be in the form of a check or money order referencing your account number and this invoice number RLNK501396079.**

**Make payments to "COPYRIGHT CLEARANCE CENTER" and send to:**

**Copyright Clearance Center**

**Dept 001**

**P.O. Box 843006**

**Boston, MA 02284-3006**

**Please disregard electronic and mailed copies if you remit payment in advance.**

**Questions? [customercare@copyright.com](mailto:customercare@copyright.com) or +1-855-239-3415 (toll free in the US) or +1-978-646-2777.**

**Gratis licenses (referencing \$0 in the Total field) are free. Please retain this printable license for your reference. No payment is required.**

---

---
